# Supplementary material
Source: publisher site journal article supplement (https://www.dovepress.com/article/265946)
Supplement: Supplementary file 1 [file get_supplementary_file.php]

## **SUPPLEMENTAL MATERIAL**

Causal effects of sleep traits on ischemic stroke and its subtypes:  
a Mendelian randomization study

**Supplementary Table 1** Details of data sources in the Mendelian randomization (MR) analysis

| Phenotype                  | Pubmed ID | Sample size (cases) | Source                                                                                        |
|----------------------------|-----------|---------------------|-----------------------------------------------------------------------------------------------|
| Short sleep duration       | 30846698  | 411,934 (106,192)   | <a href="https://sleepdisordergenetics.org/">https:// http://sleepdisordergenetics.org/</a>   |
| Long sleep duration        | 30846698  | 339,926 (34,184)    | <a href="https://sleepdisordergenetics.org/">https:// http://sleepdisordergenetics.org/</a>   |
| Continuous sleep           | 30846698  | 446,118             | <a href="https://sleepdisordergenetics.org/">https:// http://sleepdisordergenetics.org/</a>   |
| Frequent insomnia symptoms | 30804566  | 254,767 (146,410)   | <a href="https://sleepdisordergenetics.org/">https:// http://sleepdisordergenetics.org/</a>   |
| Any insomnia symptoms      | 30804566  | 532,378 (362,171)   | <a href="https://sleepdisordergenetics.org/">https:// http://sleepdisordergenetics.org/</a>   |
| Chronotype                 | 30696823  | 651,295 (372,765)   | <a href="https://sleepdisordergenetics.org/">https:// http://sleepdisordergenetics.org/</a>   |
| Large artery stroke        | 29531354  | 150,765 (4,373)     | <a href="http://www.megastroke.org/download.html">http://www.megastroke.org/download.html</a> |
| Small vessel stroke        | 29531354  | 198,048 (5,386)     | <a href="http://www.megastroke.org/download.html">http://www.megastroke.org/download.html</a> |
| Cardioembolic stroke       | 29531354  | 211,763 (7,193)     | <a href="http://www.megastroke.org/download.html">http://www.megastroke.org/download.html</a> |
| Any ischemic stroke        | 29531354  | 440,328 (34,217)    | <a href="http://www.megastroke.org/download.html">http://www.megastroke.org/download.html</a> |

**Supplementary Table 2** Single nucleotide polymorphisms (SNPs) used to construct the instruments for short sleep duration

| SNP         | Effect allele | Other allele | EAF   | $\beta$ | SE    | <i>p</i> value |
|-------------|---------------|--------------|-------|---------|-------|----------------|
| rs2863957   | C             | A            | 0.782 | 0.054   | 0.006 | 2.60E-18       |
| rs13107325  | T             | C            | 0.075 | 0.075   | 0.010 | 2.50E-13       |
| rs1229762   | T             | C            | 0.665 | 0.037   | 0.005 | 1.10E-12       |
| rs1380703   | G             | A            | 0.384 | 0.035   | 0.005 | 1.60E-11       |
| rs12963463  | C             | T            | 0.299 | 0.029   | 0.004 | 1.90E-11       |
| rs75539574  | A             | C            | 0.915 | 0.045   | 0.007 | 8.40E-11       |
| rs17388803  | C             | A            | 0.106 | 0.053   | 0.009 | 6.50E-10       |
| rs4585442   | G             | A            | 0.311 | 0.031   | 0.005 | 8.10E-10       |
| rs1607227   | G             | T            | 0.705 | 0.031   | 0.005 | 1.50E-09       |
| rs2820313   | G             | A            | 0.341 | 0.031   | 0.005 | 2.30E-09       |
| rs17005118  | A             | G            | 0.265 | 0.030   | 0.005 | 2.50E-09       |
| rs5757675   | G             | T            | 0.260 | 0.034   | 0.006 | 2.70E-09       |
| rs12567114  | G             | A            | 0.725 | 0.036   | 0.006 | 4.10E-09       |
| rs142180737 | C             | T            | 0.009 | 0.154   | 0.026 | 4.40E-09       |
| rs2186122   | T             | A            | 0.562 | 0.024   | 0.004 | 4.80E-09       |
| rs11763750  | G             | A            | 0.814 | 0.035   | 0.006 | 5.10E-09       |
| rs12518468  | C             | T            | 0.328 | 0.031   | 0.005 | 8.50E-09       |
| rs9367621   | T             | A            | 0.431 | 0.024   | 0.004 | 1.60E-08       |
| rs3776864   | A             | C            | 0.667 | 0.031   | 0.006 | 1.70E-08       |
| rs60882754  | A             | T            | 0.939 | 0.055   | 0.010 | 1.80E-08       |
| rs59779556  | T             | G            | 0.554 | 0.025   | 0.004 | 2.00E-08       |
| rs2014830   | C             | T            | 0.698 | 0.030   | 0.005 | 2.70E-08       |
| rs205024    | C             | T            | 0.617 | 0.031   | 0.005 | 2.70E-08       |
| rs12661667  | T             | C            | 0.263 | 0.028   | 0.005 | 2.80E-08       |
| rs7939345   | T             | G            | 0.208 | 0.035   | 0.006 | 4.00E-08       |
| rs9321171   | C             | T            | 0.540 | 0.031   | 0.006 | 4.20E-08       |
| rs7524118   | C             | T            | 0.708 | 0.030   | 0.005 | 4.90E-08       |

SNP, single nucleotide polymorphism; EAF, effect allele frequency; SE, standard error

**Supplementary Table 3** SNPs used to construct the instruments for frequent insomnia symptoms

| SNP         | Effect allele | Other allele | EAF   | $\beta$ | SE    | <i>p</i> value |
|-------------|---------------|--------------|-------|---------|-------|----------------|
| rs113851554 | T             | G            | 0.058 | 0.131   | 0.009 | 1.19E-43       |
| rs11651809  | G             | C            | 0.296 | 0.030   | 0.004 | 5.48E-16       |
| rs35881094  | G             | T            | 0.426 | 0.039   | 0.005 | 9.59E-16       |
| rs1942262   | A             | G            | 0.292 | 0.039   | 0.005 | 4.42E-14       |
| rs4688760   | T             | C            | 0.690 | 0.030   | 0.004 | 2.48E-13       |
| rs62158170  | A             | G            | 0.784 | 0.049   | 0.007 | 7.76E-13       |
| rs1923770   | T             | A            | 0.383 | 0.030   | 0.004 | 1.15E-12       |
| rs7711696   | T             | G            | 0.305 | 0.030   | 0.004 | 2.62E-12       |
| rs2644128   | G             | C            | 0.550 | 0.030   | 0.004 | 3.04E-12       |
| rs4886860   | G             | C            | 0.234 | 0.039   | 0.006 | 3.08E-12       |
| rs10156602  | A             | G            | 0.638 | 0.020   | 0.003 | 6.63E-12       |
| rs12405761  | A             | C            | 0.571 | 0.030   | 0.004 | 1.04E-11       |
| rs10280045  | G             | C            | 0.574 | 0.030   | 0.004 | 1.60E-11       |
| rs2296580   | G             | T            | 0.702 | 0.030   | 0.004 | 3.54E-11       |
| rs11184946  | T             | C            | 0.417 | 0.030   | 0.005 | 1.02E-10       |
| rs1592757   | C             | G            | 0.357 | 0.020   | 0.003 | 1.84E-10       |
| rs324017    | A             | C            | 0.295 | 0.030   | 0.005 | 2.01E-10       |
| rs2062113   | T             | C            | 0.430 | 0.020   | 0.003 | 2.57E-10       |
| rs4886140   | G             | A            | 0.668 | 0.030   | 0.005 | 3.75E-10       |
| rs11673344  | G             | A            | 0.380 | 0.030   | 0.005 | 7.65E-10       |
| rs314280    | G             | A            | 0.548 | 0.010   | 0.002 | 9.66E-10       |
| rs11191595  | A             | C            | 0.937 | 0.068   | 0.011 | 9.92E-10       |
| rs1031654   | C             | A            | 0.202 | 0.039   | 0.006 | 1.22E-09       |
| rs4577309   | A             | G            | 0.468 | 0.030   | 0.005 | 1.22E-09       |
| rs68094047  | T             | C            | 0.250 | 0.030   | 0.005 | 1.34E-09       |
| rs10865954  | T             | C            | 0.334 | 0.020   | 0.003 | 1.81E-09       |
| rs10838708  | G             | A            | 0.541 | 0.020   | 0.003 | 2.04E-09       |
| rs11097861  | G             | A            | 0.715 | 0.030   | 0.005 | 3.66E-09       |
| rs6593005   | G             | A            | 0.741 | 0.020   | 0.003 | 4.76E-09       |
| rs9845387   | C             | A            | 0.959 | 0.077   | 0.013 | 5.08E-09       |
| rs2956278   | G             | A            | 0.215 | 0.030   | 0.005 | 7.16E-09       |
| rs11635495  | C             | T            | 0.515 | 0.020   | 0.003 | 7.46E-09       |
| rs6932158   | C             | T            | 0.491 | 0.030   | 0.005 | 8.76E-09       |
| rs17151854  | T             | G            | 0.154 | 0.030   | 0.005 | 9.11E-09       |
| rs4751      | T             | G            | 0.425 | 0.020   | 0.003 | 9.24E-09       |
| rs3104778   | A             | G            | 0.589 | 0.020   | 0.003 | 9.89E-09       |
| rs28061     | A             | G            | 0.692 | 0.030   | 0.005 | 1.48E-08       |
| rs1841625   | G             | A            | 0.432 | 0.020   | 0.004 | 2.20E-08       |
| rs10947690  | G             | A            | 0.261 | 0.020   | 0.004 | 2.58E-08       |
| rs3824081   | T             | C            | 0.475 | 0.020   | 0.004 | 2.60E-08       |

---

|            |   |   |       |       |       |          |
|------------|---|---|-------|-------|-------|----------|
| rs1430205  | T | C | 0.458 | 0.020 | 0.004 | 3.24E-08 |
| rs11804386 | A | G | 0.332 | 0.030 | 0.005 | 3.48E-08 |
| rs6664467  | G | A | 0.863 | 0.030 | 0.005 | 3.60E-08 |
| rs17669584 | G | A | 0.195 | 0.030 | 0.005 | 4.71E-08 |
| rs4683301  | T | A | 0.600 | 0.020 | 0.004 | 6.14E-08 |
| rs17139246 | C | T | 0.389 | 0.020 | 0.004 | 7.46E-08 |
| rs2192338  | C | G | 0.780 | 0.030 | 0.006 | 9.50E-08 |
| rs2147141  | G | C | 0.543 | 0.030 | 0.006 | 1.08E-07 |
| rs11793074 | A | G | 0.853 | 0.030 | 0.006 | 1.69E-07 |
| rs2613503  | A | C | 0.802 | 0.030 | 0.006 | 2.64E-07 |
| rs1544637  | T | C | 0.488 | 0.010 | 0.002 | 4.99E-07 |
| rs11793831 | G | T | 0.583 | 0.030 | 0.006 | 2.44E-06 |
| rs302165   | G | A | 0.216 | 0.020 | 0.004 | 5.95E-06 |
| rs12713372 | C | T | 0.566 | 0.020 | 0.004 | 7.74E-06 |
| rs55946513 | C | T | 0.934 | 0.039 | 0.009 | 1.47E-05 |
| rs6785034  | A | G | 0.422 | 0.030 | 0.007 | 4.73E-05 |

---

**Supplementary Table 4** Steiger tests of short sleep duration and frequent insomnia symptoms causally linked to ischemic stroke and its subtypes

| Exposure and outcome              | Direction of causality  | Directionality <i>p</i> value |
|-----------------------------------|-------------------------|-------------------------------|
| <u>Short sleep duration</u>       |                         |                               |
| Large artery stroke               | Exposure causes outcome | 5.67E-77                      |
| Small vessel stroke               | Exposure causes outcome | 2.97E-43                      |
| Cardioembolic stroke              | Exposure causes outcome | 1.63E-73                      |
| Any ischemic stroke               | Exposure causes outcome | 1.55E-83                      |
| <u>Frequent insomnia symptoms</u> |                         |                               |
| Large artery stroke               | Exposure causes outcome | 7.58E-217                     |
| Small vessel stroke               | Exposure causes outcome | 1.34E-136                     |
| Cardioembolic stroke              | Exposure causes outcome | 6.98E-232                     |
| Any ischemic stroke               | Exposure causes outcome | 6.10E-228                     |

**Supplementary Table 5** Results and sensitivity analyses of two-sample MR of any insomnia symptoms, continuous sleep, long sleep duration, and chronotype against ischemic stroke and its subtypes

| Exposure                        | Large artery stroke |                | Small vessel stroke |                | Cardioembolic stroke |                | Any ischemic stroke |                |
|---------------------------------|---------------------|----------------|---------------------|----------------|----------------------|----------------|---------------------|----------------|
|                                 | OR (95%CI)          | <i>p</i> value | OR (95%CI)          | <i>p</i> value | OR (95%CI)           | <i>p</i> value | OR (95%CI)          | <i>p</i> value |
| <u>Any insomnia symptoms</u>    |                     |                |                     |                |                      |                |                     |                |
| IVW                             | 1.19 (1.00-1.42)    | 0.049          | 0.95 (0.81-1.11)    | 0.517          | 0.97 (0.85-1.11)     | 0.666          | 1.01 (0.94-1.08)    | 0.817          |
| MR-PRESSO                       | 1.25 (1.03-1.50)    | 0.024          | -                   | -              | -                    | -              | -                   | -              |
| MR-RAPS                         | 1.25 (1.02-1.53)    | 0.032          | 0.96 (0.79-1.16)    | 0.679          | 0.98 (0.85-1.14)     | 0.827          | 1.01 (0.93-1.10)    | 0.741          |
| WME                             | 1.29 (0.99-1.68)    | 0.060          | 0.95 (0.74-1.23)    | 0.718          | 1.02 (0.84-1.25)     | 0.811          | 1.02 (0.91-1.14)    | 0.757          |
| MR-Egger                        | 1.09 (0.57-2.06)    | 0.408          | 1.11 (0.62-1.99)    | 0.339          | 1.24 (0.78-1.96)     | 0.178          | 1.07 (0.83-1.38)    | 0.313          |
| <u>Continuous sleep</u>         |                     |                |                     |                |                      |                |                     |                |
| IVW                             | 0.74 (0.50-1.11)    | 0.143          | 0.86 (0.59-1.24)    | 0.410          | 1.11 (0.81-1.51)     | 0.524          | 0.93 (0.79-1.09)    | 0.364          |
| MR-RAPS                         | 0.74 (0.47-1.16)    | 0.188          | 0.83 (0.55-1.26)    | 0.394          | 1.20 (0.86-1.68)     | 0.290          | 0.98 (0.82-1.16)    | 0.773          |
| WME                             | 0.91 (0.48-1.71)    | 0.767          | 0.85 (0.47-1.54)    | 0.581          | 1.23 (0.76-1.97)     | 0.395          | 0.98 (0.76-1.25)    | 0.857          |
| MR-Egger                        | 0.93 (0.22-3.97)    | 0.457          | 0.47 (0.13-1.71)    | 0.125          | 1.15 (0.44-3.00)     | 0.392          | 0.84 (0.48-1.48)    | 0.277          |
| <u>Long sleep duration</u>      |                     |                |                     |                |                      |                |                     |                |
| IVW                             | 1.17 (0.87-1.56)    | 0.291          | 1.04 (0.79-1.36)    | 0.789          | 1.23 (0.98-1.55)     | 0.073          | 0.98 (0.87-1.10)    | 0.723          |
| MR-RAPS                         | 1.17 (0.86-1.59)    | 0.319          | 1.03 (0.78-1.38)    | 0.816          | 1.23 (0.96-1.56)     | 0.101          | 0.98 (0.86-1.11)    | 0.733          |
| WME                             | 1.05 (0.72-1.52)    | 0.812          | 1.01 (0.72-1.41)    | 0.967          | 1.18 (0.90-1.56)     | 0.233          | 0.99 (0.85-1.15)    | 0.850          |
| MR-Egger                        | 0.78 (0.40-1.53)    | 0.249          | 0.99 (0.54-1.81)    | 0.501          | 1.13 (0.69-1.83)     | 0.323          | 0.93 (0.69-1.24)    | 0.303          |
| <u>Chronotype (morningness)</u> |                     |                |                     |                |                      |                |                     |                |
| IVW                             | 1.02 (0.95-1.09)    | 0.679          | 1.01 (0.94-1.08)    | 0.796          | 1.01 (0.96-1.07)     | 0.604          | 1.00 (0.97-1.03)    | 0.824          |
| MR-PRESSO                       | 1.02 (0.94-1.11)    | 0.602          | -                   | -              | 1.02 (0.96-1.08)     | 0.519          | 1.00 (0.97-1.03)    | 0.954          |
| MR-RAPS                         | 1.01 (0.93-1.10)    | 0.787          | 1.00 (0.94-1.08)    | 0.930          | 1.02 (0.95-1.08)     | 0.591          | 1.00 (0.97-1.04)    | 0.778          |
| WME                             | 1.02 (0.91-1.14)    | 0.769          | 1.04 (0.94-1.15)    | 0.485          | 1.01 (0.93-1.10)     | 0.801          | 1.00 (0.96-1.05)    | 0.903          |
| MR-Egger                        | 1.04 (0.83-1.31)    | 0.367          | 1.00 (0.81-1.24)    | 0.504          | 0.98 (0.82-1.16)     | 0.371          | 0.98 (0.89-1.08)    | 0.349          |

MR-PRESSO results are not showed if no outlier is identified. OR, odds ratio; CI, confidence interval; IVW, inverse-variance weighted; MR-PRESSO, MR-Pleiotropy Residual Sum and Outlier; MR-RAPS, MR-Robust Adjusted Profile Score; WME, weighted median estimate



**Supplementary Table 6** Heterogeneity tests of sleep traits causally linked to ischemic stroke and its subtypes

| Exposure                   | Large artery stroke |                | Small vessel stroke |                | Cardioembolic stroke |                | Any ischemic stroke |                |
|----------------------------|---------------------|----------------|---------------------|----------------|----------------------|----------------|---------------------|----------------|
|                            | Cochran's Q         | <i>p</i> value | Cochran's Q         | <i>p</i> value | Cochran's Q          | <i>p</i> value | Cochran's Q         | <i>p</i> value |
| Short sleep duration       | 26.47               | 0.438          | 24.19               | 0.508          | 32.20                | 0.152          | 18.15               | 0.836          |
| Long sleep duration        | 3.69                | 0.594          | 1.96                | 0.854          | 2.02                 | 0.846          | 2.36                | 0.797          |
| Continuous sleep           | 90.32               | 0.095          | 79.23               | 0.318          | 80.59                | 0.281          | 85.73               | 0.166          |
| Frequent insomnia symptoms | 76.02               | 0.032          | 68.84               | 0.099          | 52.84                | 0.558          | 74.34               | 0.042          |
| Any insomnia symptoms      | 76.08               | 0.031          | 68.79               | 0.100          | 52.82                | 0.558          | 74.34               | 0.042          |
| Chronotype                 | 431.08              | 1.72E-04       | 340.91              | 0.342          | 396.23               | 0.008          | 511.40              | 6.87E-10       |

**Supplementary Table 7** Horizontal pleiotropy tests of sleep traits causally linked to ischemic stroke and its subtypes

| Exposure                   | Large artery stroke |       |                | Small vessel stroke |       |                | Cardioembolic stroke |       |                | Any ischemic stroke |       |                |
|----------------------------|---------------------|-------|----------------|---------------------|-------|----------------|----------------------|-------|----------------|---------------------|-------|----------------|
|                            | Intercept           | SE    | <i>p</i> value | Intercept           | SE    | <i>p</i> value | Intercept            | SE    | <i>p</i> value | Intercept           | SE    | <i>p</i> value |
| Short sleep duration       | -0.011              | 0.022 | 0.618          | 0.015               | 0.021 | 0.480          | -0.008               | 0.021 | 0.705          | -0.002              | 0.009 | 0.813          |
| Long sleep duration        | -0.047              | 0.038 | 0.290          | -0.015              | 0.036 | 0.691          | -0.011               | 0.030 | 0.734          | -0.006              | 0.015 | 0.708          |
| Continuous sleep           | 0.006               | 0.014 | 0.670          | -0.008              | 0.012 | 0.530          | -0.009               | 0.010 | 0.362          | -0.001              | 0.006 | 0.850          |
| Frequent insomnia symptoms | -0.005              | 0.012 | 0.692          | 0.004               | 0.011 | 0.736          | -2.60E-04            | 0.008 | 0.974          | 0.004               | 0.005 | 0.445          |
| Any insomnia symptoms      | -0.004              | 0.012 | 0.725          | 0.005               | 0.011 | 0.666          | 2.34E-04             | 0.008 | 0.976          | 0.004               | 0.005 | 0.448          |
| Chronotype                 | -0.005              | 0.005 | 0.336          | -0.006              | 0.004 | 0.191          | -5.57E-05            | 0.004 | 0.990          | -3.95E-04           | 0.002 | 0.865          |

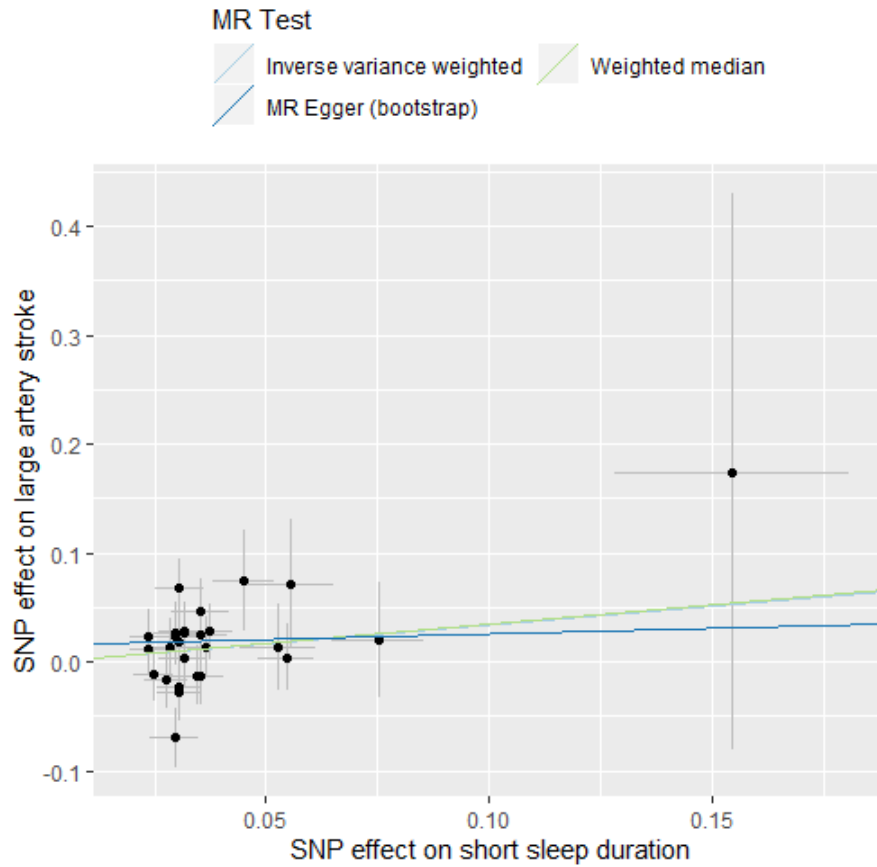

**Supplementary Figure 1** Scatterplot of SNP potential effects on short sleep duration vs large artery stroke, with the slope of each line corresponding to estimated MR effect per method. MR, Mendelian randomization; SNP, single nucleotide polymorphism

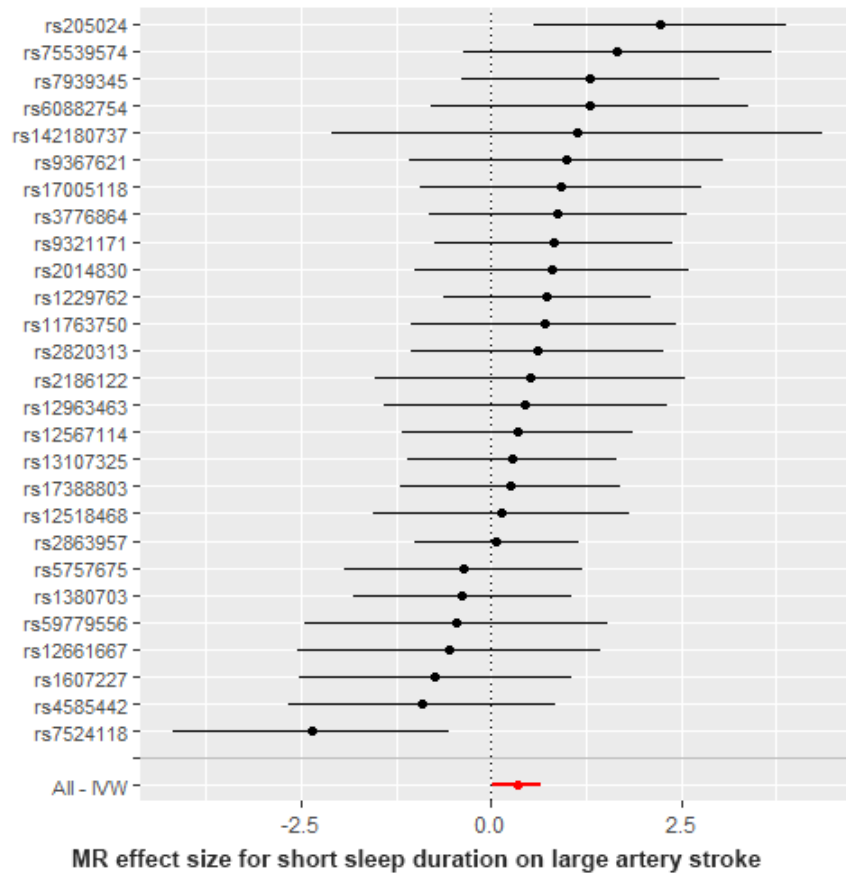

**Supplementary Figure 2** Forest plot of individual and combined SNP MR-estimated effects sizes for short sleep duration on large artery stroke. Data is displayed as regression coefficient ( $\beta$ ) and 95% CI. CI, confidence interval; IVW, inverse variance-weighted method

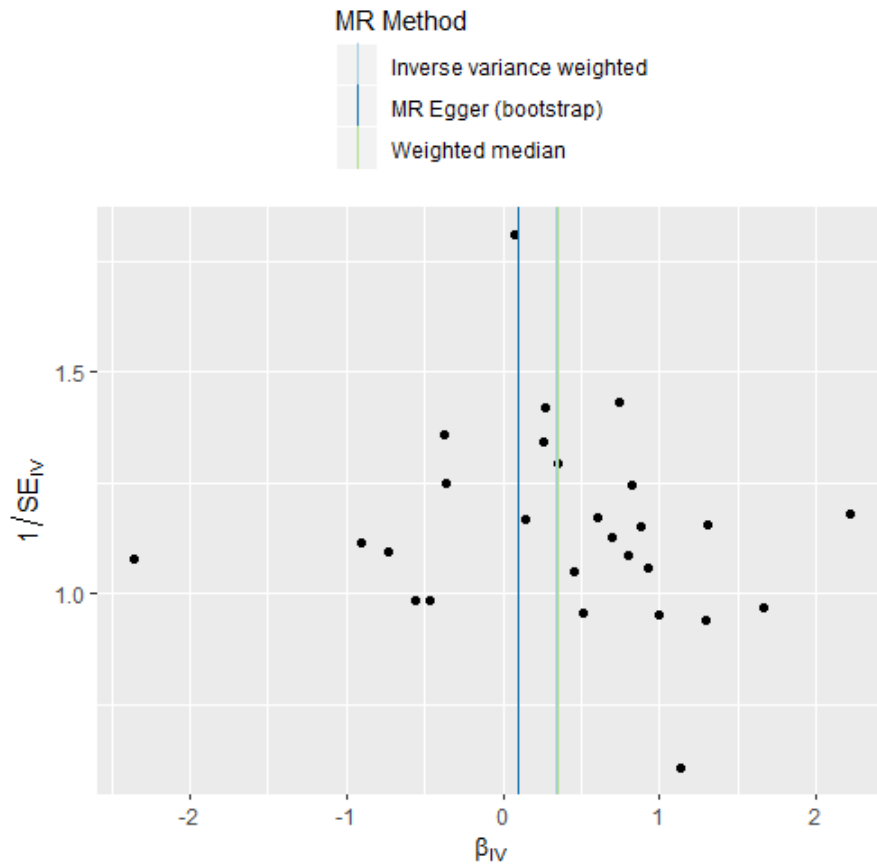

**Supplementary Figure 3** Funnel plot related to the short sleep duration genetic instrument with respect to large artery stroke. Funnel plot reports the contribution of each variant (effect size on the x-axis, 1/SE on the y-axis) to MR estimate

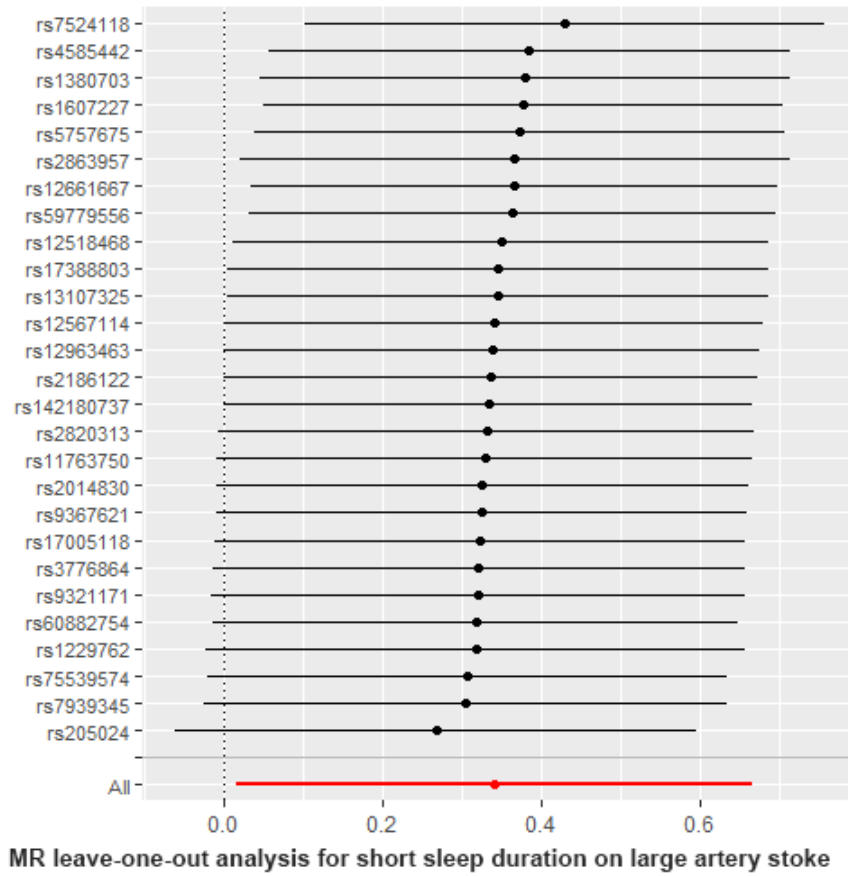

**Supplementary Figure 4** Leave-one-out analysis related to the short sleep duration genetic instrument with respect to large artery stroke. Leave-one-out plot reports the MR estimate excluding one variant at a time from the genetic instrument

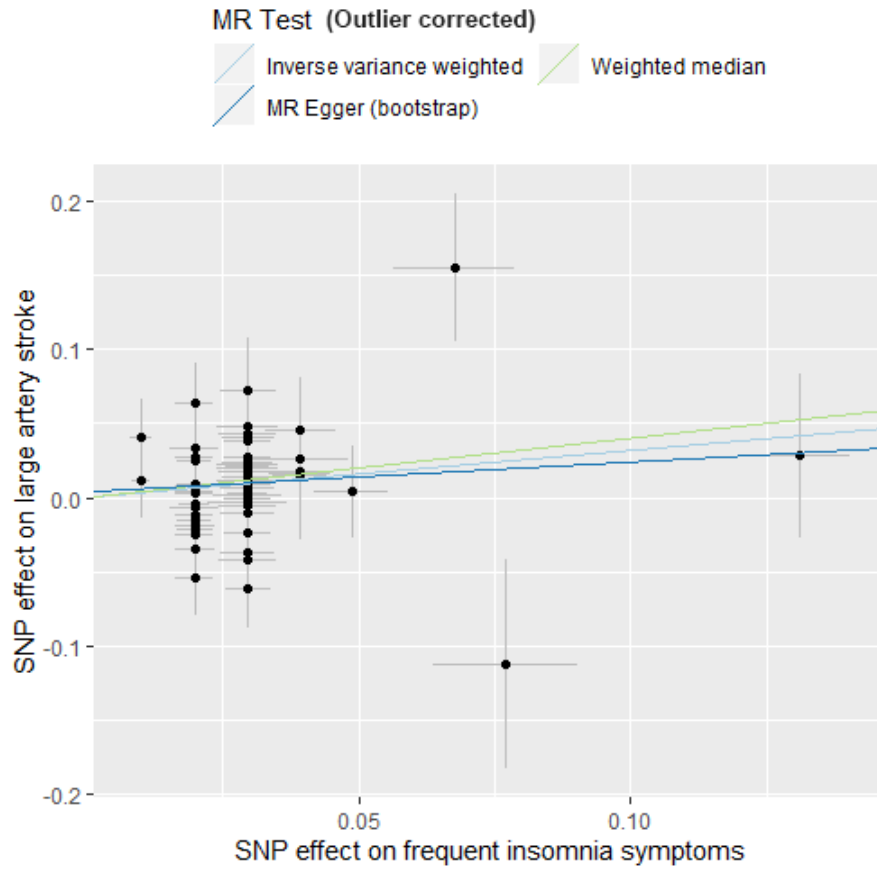

**Supplementary Figure 5** Scatterplot of SNP potential effects on frequent insomnia symptoms vs large artery stroke, with the slope of each line corresponding to estimated MR effect per method after removing the outlier SNP rs324017

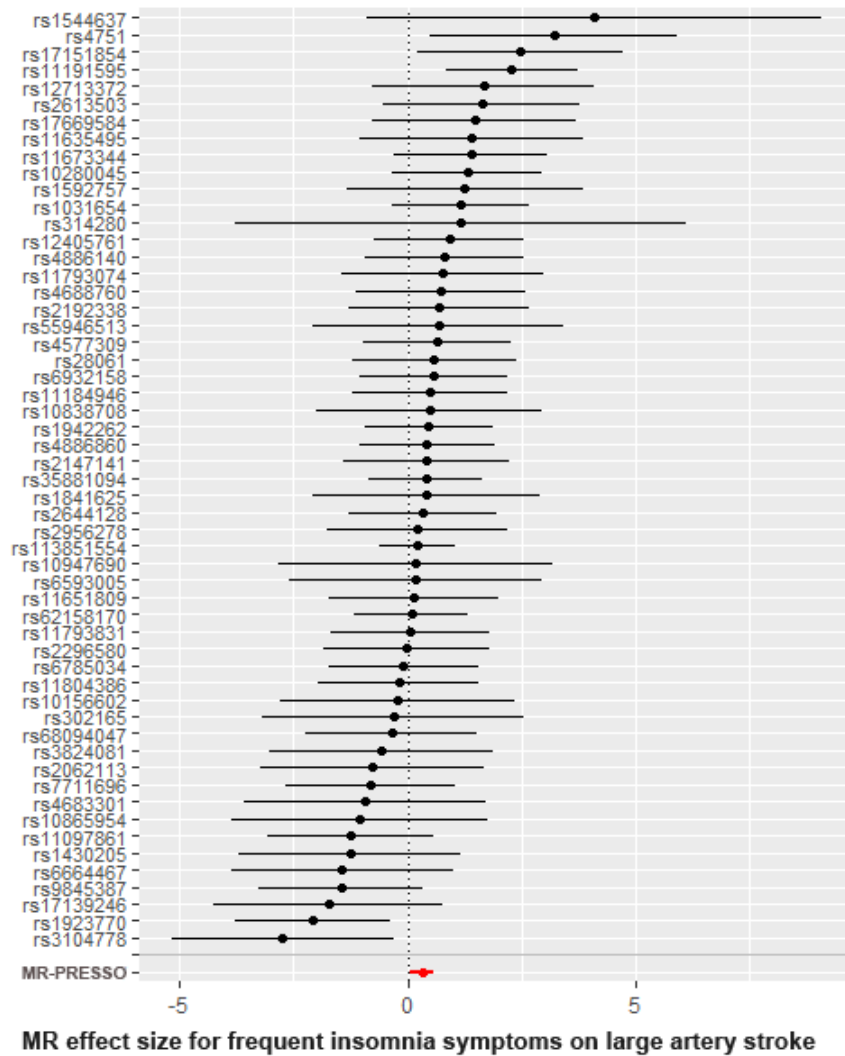

**Supplementary Figure 6** Forest plot of individual and combined SNP MR-estimated effects sizes for frequent insomnia symptoms on large artery stroke after removing the outlier SNP rs324017. Data is displayed as  $\beta$  and 95% CI. MR-PRESSO, MR-Pleiotropy Residual Sum and Outlier method



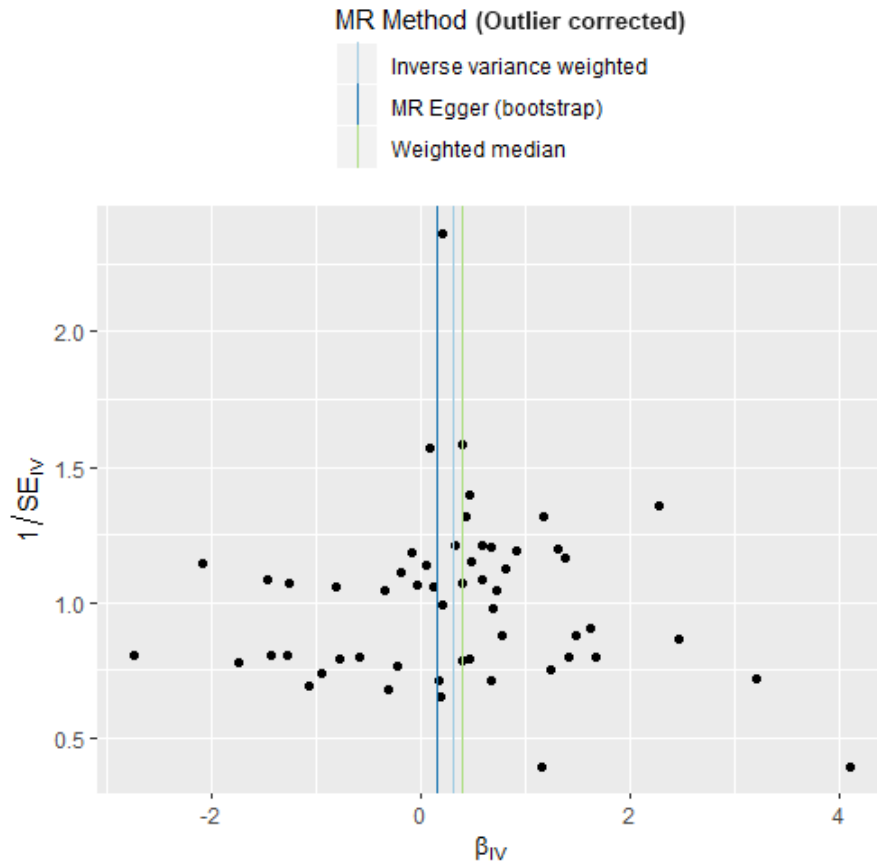

**Supplementary Figure 7** Funnel plot related to the frequent insomnia symptoms genetic instrument with respect to large artery stroke after removing the outlier SNP rs324017. Funnel plot reports the contribution of each variant (effect size on the x-axis, 1/SE on the y-axis) to MR estimate

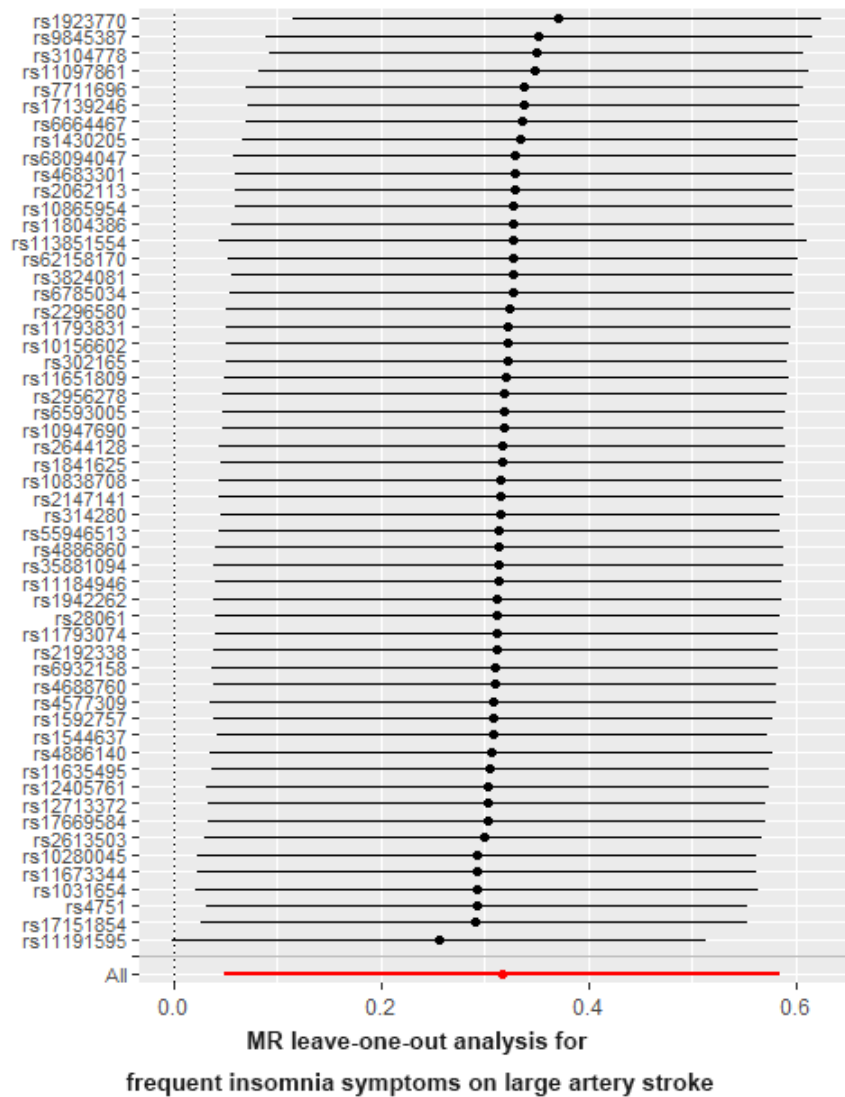

**Supplementary Figure 8** Leave-one-out analysis related to the frequent insomnia symptoms genetic instrument with respect to large artery stroke after removing the outlier SNP rs324017. Leave-one-out plot reports the MR estimate excluding one variant at a time from the genetic instrument

## MEGASTROKE CONSORTIUM

Rainer Malik <sup>1</sup>, Ganesh Chauhan <sup>2</sup>, Matthew Traylor <sup>3</sup>, Muralidharan Sargurupremraj <sup>4,5</sup>, Yukinori Okada <sup>6,7,8</sup>, Aniket Mishra <sup>4,5</sup>, Loes Rutten-Jacobs <sup>3</sup>, Anne-Katrin Giese <sup>9</sup>, Sander W van der Laan <sup>10</sup>, Solveig Gretarsdottir <sup>11</sup>, Christopher D Anderson <sup>12,13,14,14</sup>, Michael Chong <sup>15</sup>, Hieab HH Adams <sup>16,17</sup>, Tetsuro Ago <sup>18</sup>, Peter Almgren <sup>19</sup>, Philippe Amouyel <sup>20,21</sup>, Hakan Ay <sup>22,13</sup>, Traci M Bartz <sup>23</sup>, Oscar R Benavente <sup>24</sup>, Steve Bevan <sup>25</sup>, Giorgio B Boncoraglio <sup>26</sup>, Robert D Brown, Jr. <sup>27</sup>, Adam S Butterworth <sup>28,29</sup>, Caty Carrera <sup>30,31</sup>, Cara L Carty <sup>32,33</sup>, Daniel I Chasman <sup>34,35</sup>, Wei-Min Chen <sup>36</sup>, John W Cole <sup>37</sup>, Adolfo Correa <sup>38</sup>, Ioana Cotlarciuc <sup>39</sup>, Carlos Cruchaga <sup>40,41</sup>, John Danesh <sup>28,42,43,44</sup>, Paul IW de Bakker <sup>45,46</sup>, Anita L DeStefano <sup>47,48</sup>, Marcel den Hoed <sup>49</sup>, Qing Duan <sup>50</sup>, Stefan T Engelter <sup>51,52</sup>, Guido J Falcone <sup>53,54</sup>, Rebecca F Gottesman <sup>55</sup>, Raji P Grewal <sup>56</sup>, Vilmundur Gudnason <sup>57,58</sup>, Stefan Gustafsson <sup>59</sup>, Jeffrey Haessler <sup>60</sup>, Tamara B Harris <sup>61</sup>, Ahamad Hassan <sup>62</sup>, Aki S Havulinna <sup>63,64</sup>, Susan R Heckbert <sup>65</sup>, Elizabeth G Holliday <sup>66,67</sup>, George Howard <sup>68</sup>, Fang-Chi Hsu <sup>69</sup>, Hyacinth I Hyacinth <sup>70</sup>, M Arfan Ikram <sup>16</sup>, Erik Ingelsson <sup>71,72</sup>, Marguerite R Irvin <sup>73</sup>, Xueqiu Jian <sup>74</sup>, Jordi Jim énez-Conde <sup>75</sup>, Julie A Johnson <sup>76,77</sup>, J Wouter Jukema <sup>78</sup>, Masahiro Kanai <sup>6,7,79</sup>, Keith L Keene <sup>80,81</sup>, Brett M Kissela <sup>82</sup>, Dawn O Kleindorfer <sup>82</sup>, Charles Kooperberg <sup>60</sup>, Michiaki Kubo <sup>83</sup>, Leslie A Lange <sup>84</sup>, Carl D Langefeld <sup>85</sup>, Claudia Langenberg <sup>86</sup>, Lenore J Launer <sup>87</sup>, Jin-Moo Lee <sup>88</sup>, Robin Lemmens <sup>89,90</sup>, Didier Leys <sup>91</sup>, Cathryn M Lewis <sup>92,93</sup>, Wei-Yu Lin <sup>28,94</sup>, Arne G Lindgren <sup>95,96</sup>, Erik Lorentzen <sup>97</sup>, Patrik K Magnusson <sup>98</sup>, Jane Maguire <sup>99</sup>, Ani Manichaikul <sup>36</sup>, Patrick F McArdle <sup>100</sup>, James F Meschia <sup>101</sup>, Braxton D Mitchell <sup>100,102</sup>, Thomas H Mosley <sup>103,104</sup>, Michael A Nalls <sup>105,106</sup>, Toshiharu Ninomiya <sup>107</sup>, Martin J O'Donnell <sup>15,108</sup>, Bruce M Psaty <sup>109,110,111,112</sup>, Sara L Pulit <sup>113,45</sup>, Kristiina Rannikmäe <sup>114,115</sup>, Alexander P Reiner <sup>65,116</sup>, Kathryn M Rexrode <sup>117</sup>, Kenneth Rice <sup>118</sup>, Stephen S Rich <sup>36</sup>, Paul M Ridker <sup>34,35</sup>, Natalia S Rost <sup>9,13</sup>, Peter M Rothwell <sup>119</sup>, Jerome I Rotter <sup>120,121</sup>, Tatjana Rundek <sup>122</sup>, Ralph L Sacco <sup>122</sup>, Saori Sakaue <sup>7,123</sup>, Michele M Sale <sup>124</sup>, Veikko Salomaa <sup>63</sup>, Bishwa R Sapkota <sup>125</sup>, Reinhold Schmidt <sup>126</sup>, Carsten O Schmidt <sup>127</sup>, Ulf Schminke <sup>128</sup>, Pankaj Sharma <sup>39</sup>, Agnieszka Slowik <sup>129</sup>, Cathie LM Sudlow <sup>114,115</sup>, Christian Tanislav <sup>130</sup>, Turgut Tatlisumak <sup>131,132</sup>, Kent D Taylor <sup>120,121</sup>, Vincent NS Thijs <sup>133,134</sup>, Gudmar Thorleifsson <sup>11</sup>, Unnur Thorsteinsdottir <sup>11</sup>, Steffen Tiedt <sup>1</sup>, Stella Trompet <sup>135</sup>, Christophe Tzourio <sup>5,136,137</sup>, Cornelia M van Duijn <sup>138,139</sup>, Matthew Walters <sup>140</sup>, Nicholas J Wareham <sup>86</sup>, Sylvia Wassertheil-Smoller <sup>141</sup>, James G Wilson <sup>142</sup>, Kerri L Wiggins <sup>109</sup>, Qiong Yang <sup>47</sup>, Salim Yusuf <sup>15</sup>, Najaf Amin <sup>16</sup>, Hugo S Aparicio <sup>185,48</sup>, Donna K Arnett <sup>186</sup>, John Attia <sup>187</sup>, Alexa S Beiser <sup>47,48</sup>, Claudine Berr <sup>188</sup>, Julie E Buring <sup>34,35</sup>, Mariana Bustamante <sup>189</sup>, Valeria Caso <sup>190</sup>, Yu-Ching Cheng <sup>191</sup>, Seung Hoan Choi <sup>192,48</sup>, Ayesha Chowhan <sup>185,48</sup>, Natalia Cullell <sup>31</sup>, Jean-Fran çois Dartigues <sup>193,194</sup>, Hossein Delavaran <sup>95,96</sup>, Pilar Delgado <sup>195</sup>, Marcus Dörr <sup>196,197</sup>, Gunnar Engström <sup>19</sup>, Ian Ford <sup>198</sup>, Wander S Gurpreet <sup>199</sup>, Anders Hamsten <sup>200,201</sup>, Laura Heitsch <sup>202</sup>, Atsushi Hozawa <sup>203</sup>, Laura Ibanez <sup>204</sup>, Andreea Ilinca <sup>95,96</sup>, Martin Ingelsson <sup>205</sup>, Motoki Iwasaki <sup>206</sup>, Rebecca D Jackson <sup>207</sup>,

Katarina Jood <sup>208</sup>, Pekka Jousilahti <sup>63</sup>, Sara Kaffashian <sup>4,5</sup>, Lalit Kalra <sup>209</sup>, Masahiro Kamouchi <sup>210</sup>, Takanari Kitazono <sup>211</sup>, Olafur Kjartansson <sup>212</sup>, Manja Kloss <sup>213</sup>, Peter J Koudstaal <sup>214</sup>, Jerzy Krupinski <sup>215</sup>, Daniel L Labovitz <sup>216</sup>, Cathy C Laurie <sup>118</sup>, Christopher R Levi <sup>217</sup>, Linxin Li <sup>218</sup>, Lars Lind <sup>219</sup>, Cecilia M Lindgren <sup>220,221</sup>, Vasileios Lioutas <sup>222,48</sup>, Yong Mei Liu <sup>223</sup>, Oscar L Lopez <sup>224</sup>, Hirata Makoto <sup>225</sup>, Nicolas Martinez-Majander <sup>172</sup>, Koichi Matsuda <sup>225</sup>, Naoko Minegishi <sup>203</sup>, Joan Montaner <sup>226</sup>, Andrew P Morris <sup>227,228</sup>, Elena Muiño <sup>31</sup>, Martina Müller-Nurasyid <sup>229,230,231</sup>, Bo Norrving <sup>95,96</sup>, Soichi Ogishima <sup>203</sup>, Eugenio A Parati <sup>232</sup>, Leema Reddy Peddareddygar <sup>56</sup>, Nancy L Pedersen <sup>98,233</sup>, Joanna Pera <sup>129</sup>, Markus Perola <sup>63,234</sup>, Alessandro Pezzini <sup>235</sup>, Silvana Pileggi <sup>236</sup>, Raquel Rabionet <sup>237</sup>, Iolanda Riba-Llena <sup>30</sup>, Marta Ribas és <sup>238</sup>, Jose R Romero <sup>185,48</sup>, Jaume Roquer <sup>239,240</sup>, Anthony G Rudd <sup>241,242</sup>, Antti-Pekka Sarin <sup>243,244</sup>, Ralhan Sarju <sup>199</sup>, Chloe Sarnowski <sup>47,48</sup>, Makoto Sasaki <sup>245</sup>, Claudia L Satizabal <sup>185,48</sup>, Mamoru Satoh <sup>245</sup>, Naveed Sattar <sup>246</sup>, Norie Sawada <sup>206</sup>, Gerli Sibolt <sup>172</sup>, Ásgeir Sigurdsson <sup>247</sup>, Albert Smith <sup>248</sup>, Kenji Sobue <sup>245</sup>, Carolina Soriano-Tárraga <sup>240</sup>, Tara Stanne <sup>249</sup>, O Colin Stine <sup>250</sup>, David J Stott <sup>251</sup>, Konstantin Strauch <sup>229,252</sup>, Takako Takai <sup>203</sup>, Hideo Tanaka <sup>253,254</sup>, Kozo Tanno <sup>245</sup>, Alexander Teumer <sup>255</sup>, Liisa Tomppo <sup>172</sup>, Nuria P Torres-Aguila <sup>31</sup>, Emmanuel Touze <sup>256,257</sup>, Shoichiro Tsugane <sup>206</sup>, Andre G Uitterlinden <sup>258</sup>, Einar M Valdimarsson <sup>259</sup>, Sven J van der Lee <sup>16</sup>, Henry Völzke <sup>255</sup>, Kenji Wakai <sup>253</sup>, David Weir <sup>260</sup>, Stephen R Williams <sup>261</sup>, Charles DA Wolfe <sup>241,242</sup>, Quenna Wong <sup>118</sup>, Huichun Xu <sup>191</sup>, Taiki Yamaji <sup>206</sup>, Dharambir K Sanghera <sup>125,169,170</sup>, Olle Melander <sup>19</sup>, Christina Jern <sup>171</sup>, Daniel Strbian <sup>172,173</sup>, Israel Fernandez-Cadenas <sup>31,30</sup>, W T Longstreth, Jr <sup>174,65</sup>, Arndt Rolfs <sup>175</sup>, Jun Hata <sup>107</sup>, Daniel Woo <sup>82</sup>, Jonathan Rosand <sup>12,13,14</sup>, Guillaume Pare <sup>15</sup>, Jemma C Hopewell <sup>176</sup>, Danish Saleheen <sup>177</sup>, Kari Stefansson <sup>11,178</sup>, Bradford B Worrall <sup>179</sup>, Steven J Kittner <sup>37</sup>, Sudha Seshadri <sup>180,48</sup>, Myriam Fornage <sup>74,181</sup>, Hugh S Markus <sup>3</sup>, Joanna MM Howson <sup>28</sup>, Yoichiro Kamatani <sup>6,182</sup>, Stephanie Dobbie <sup>4,5</sup>, Martin Dichgans <sup>1,183,184</sup>

1 Institute for Stroke and Dementia Research (ISD), University Hospital, LMU Munich, Munich, Germany

2 Centre for Brain Research, Indian Institute of Science, Bangalore, India

3 Stroke Research Group, Division of Clinical Neurosciences, University of Cambridge, UK

4 INSERM U1219 Bordeaux Population Health Research Center, Bordeaux, France

5 University of Bordeaux, Bordeaux, France

6 Laboratory for Statistical Analysis, RIKEN Center for Integrative Medical Sciences, Yokohama, Japan

7 Department of Statistical Genetics, Osaka University Graduate School of Medicine, Osaka, Japan

8 Laboratory of Statistical Immunology, Immunology Frontier Research Center (WPI-IFReC), Osaka University, Suita, Japan.

9 Department of Neurology, Massachusetts General Hospital, Harvard Medical School, Boston, MA, USA

- 10 Laboratory of Experimental Cardiology, Division of Heart and Lungs, University Medical Center Utrecht, University of Utrecht, Utrecht, Netherlands
- 11 deCODE genetics/AMGEN inc, Reykjavik, Iceland
- 12 Center for Genomic Medicine, Massachusetts General Hospital (MGH), Boston, MA, USA
- 13 J. Philip Kistler Stroke Research Center, Department of Neurology, MGH, Boston, MA, USA
- 14 Program in Medical and Population Genetics, Broad Institute, Cambridge, MA, USA
- 15 Population Health Research Institute, McMaster University, Hamilton, Canada
- 16 Department of Epidemiology, Erasmus University Medical Center, Rotterdam, Netherlands
- 17 Department of Radiology and Nuclear Medicine, Erasmus University Medical Center, Rotterdam, Netherlands
- 18 Department of Medicine and Clinical Science, Graduate School of Medical Sciences, Kyushu University, Fukuoka, Japan
- 19 Department of Clinical Sciences, Lund University, Malmö, Sweden
- 20 Univ. Lille, Inserm, Institut Pasteur de Lille, LabEx DISTALZ-UMR1167, Risk factors and molecular determinants of aging-related diseases, F-59000 Lille, France
- 21 Centre Hosp. Univ Lille, Epidemiology and Public Health Department, F-59000 Lille, France
- 22 AA Martinos Center for Biomedical Imaging, Department of Radiology, Massachusetts General Hospital, Harvard Medical School, Boston, MA, USA
- 23 Cardiovascular Health Research Unit, Departments of Biostatistics and Medicine, University of Washington, Seattle, WA, USA
- 24 Division of Neurology, Faculty of Medicine, Brain Research Center, University of British Columbia, Vancouver, Canada
- 25 School of Life Science, University of Lincoln, Lincoln, UK
- 26 Department of Cerebrovascular Diseases, Fondazione IRCCS Istituto Neurologico "Carlo Besta", Milano, Italy
- 27 Department of Neurology, Mayo Clinic Rochester, Rochester, MN, USA
- 28 MRC/BHF Cardiovascular Epidemiology Unit, Department of Public Health and Primary Care, University of Cambridge, Cambridge, UK
- 29 The National Institute for Health Research Blood and Transplant Research Unit in Donor Health and Genomics, University of Cambridge, UK
- 30 Neurovascular Research Laboratory, Vall d'Hebron Institut of Research, Neurology and Medicine Departments-Universitat Autònoma de Barcelona, Vall d'Hebrón Hospital, Barcelona, Spain
- 31 Stroke Pharmacogenomics and Genetics, Fundacio Docència i Recerca MutuaTerrassa, Terrassa, Spain
- 32 Children's Research Institute, Children's National Medical Center, Washington, DC, USA

33 Center for Translational Science, George Washington University, Washington, DC, USA

34 Division of Preventive Medicine, Brigham and Women's Hospital, Boston, MA, USA

35 Harvard Medical School, Boston, MA, USA

36 Center for Public Health Genomics, Department of Public Health Sciences, University of Virginia, Charlottesville, VA, USA

37 Department of Neurology, University of Maryland School of Medicine and Baltimore VAMC, Baltimore, MD, USA

38 Departments of Medicine, Pediatrics and Population Health Science, University of Mississippi Medical Center, Jackson, MS, USA

39 Institute of Cardiovascular Research, Royal Holloway University of London, UK & Ashford and St Peters Hospital, Surrey UK

40 Department of Psychiatry, The Hope Center Program on Protein Aggregation and Neurodegeneration (HPAN), Washington University, School of Medicine, St. Louis, MO, USA

41 Department of Developmental Biology, Washington University School of Medicine, St. Louis, MO, USA

42 NIHR Blood and Transplant Research Unit in Donor Health and Genomics, Department of Public Health and Primary Care, University of Cambridge, Cambridge, UK

43 Wellcome Trust Sanger Institute, Wellcome Trust Genome Campus, Hinxton, Cambridge, UK

44 British Heart Foundation, Cambridge Centre of Excellence, Department of Medicine, University of Cambridge, Cambridge, UK

45 Department of Medical Genetics, University Medical Center Utrecht, Utrecht, Netherlands

46 Department of Epidemiology, Julius Center for Health Sciences and Primary Care, University Medical Center Utrecht, Utrecht, Netherlands

47 Boston University School of Public Health, Boston, MA, USA

48 Framingham Heart Study, Framingham, MA, USA

49 Department of Immunology, Genetics and Pathology and Science for Life Laboratory, Uppsala University, Uppsala, Sweden

50 Department of Genetics, University of North Carolina, Chapel Hill, NC, USA

51 Department of Neurology and Stroke Center, Basel University Hospital, Switzerland

52 Neurorehabilitation Unit, University and University Center for Medicine of Aging and Rehabilitation Basel, Felix Platter Hospital, Basel, Switzerland

53 Department of Neurology, Yale University School of Medicine, New Haven, CT, USA

54 Program in Medical and Population Genetics, The Broad Institute of Harvard and MIT, Cambridge, MA, USA

55 Department of Neurology, Johns Hopkins University School of Medicine, Baltimore, MD, USA

56 Neuroscience Institute, SF Medical Center, Trenton, NJ, USA  
57 Icelandic Heart Association Research Institute, Kopavogur, Iceland  
58 University of Iceland, Faculty of Medicine, Reykjavik, Iceland  
59 Department of Medical Sciences, Molecular Epidemiology and Science for Life Laboratory, Uppsala University, Uppsala, Sweden  
60 Division of Public Health Sciences, Fred Hutchinson Cancer Research Center, Seattle, WA, USA  
61 Laboratory of Epidemiology and Population Science, National Institute on Aging, National Institutes of Health, Bethesda, MD, USA  
62 Department of Neurology, Leeds General Infirmary, Leeds Teaching Hospitals NHS Trust, Leeds, UK  
63 National Institute for Health and Welfare, Helsinki, Finland  
64 FIMM - Institute for Molecular Medicine Finland, Helsinki, Finland  
65 Department of Epidemiology, University of Washington, Seattle, WA, USA  
66 Public Health Stream, Hunter Medical Research Institute, New Lambton, Australia  
67 Faculty of Health and Medicine, University of Newcastle, Newcastle, Australia  
68 School of Public Health, University of Alabama at Birmingham, Birmingham, AL, USA  
69 Department of Biostatistical Sciences, Wake Forest School of Medicine, Winston-Salem, NC, USA  
70 Aflac Cancer and Blood Disorder Center, Department of Pediatrics, Emory University School of Medicine, Atlanta, GA, USA  
71 Department of Medicine, Division of Cardiovascular Medicine, Stanford University School of Medicine, CA, USA  
72 Department of Medical Sciences, Molecular Epidemiology and Science for Life Laboratory, Uppsala University, Uppsala, Sweden  
73 Epidemiology, School of Public Health, University of Alabama at Birmingham, USA  
74 Brown Foundation Institute of Molecular Medicine, University of Texas Health Science Center at Houston, Houston, TX, USA  
75 Neurovascular Research Group (NEUVAS), Neurology Department, Institut Hospital del Mar d'Investigació Mèdica, Universitat Autònoma de Barcelona, Barcelona, Spain  
76 Department of Pharmacotherapy and Translational Research and Center for Pharmacogenomics, University of Florida, College of Pharmacy, Gainesville, FL, USA  
77 Division of Cardiovascular Medicine, College of Medicine, University of Florida, Gainesville, FL, USA  
78 Department of Cardiology, Leiden University Medical Center, Leiden, the Netherlands  
79 Program in Bioinformatics and Integrative Genomics, Harvard Medical School, Boston, MA, USA  
80 Department of Biology, East Carolina University, Greenville, NC, USA

- 81 Center for Health Disparities, East Carolina University, Greenville, NC, USA
- 82 University of Cincinnati College of Medicine, Cincinnati, OH, USA
- 83 RIKEN Center for Integrative Medical Sciences, Yokohama, Japan
- 84 Department of Medicine, University of Colorado Denver, Anschutz Medical Campus, Aurora, CO, USA
- 85 Center for Public Health Genomics and Department of Biostatistical Sciences, Wake Forest School of Medicine, Winston-Salem, NC, USA
- 86 MRC Epidemiology Unit, University of Cambridge School of Clinical Medicine, Institute of Metabolic Science, Cambridge Biomedical Campus, Cambridge, UK
- 87 Intramural Research Program, National Institute on Aging, National Institutes of Health, Bethesda, MD, USA
- 88 Department of Neurology, Radiology, and Biomedical Engineering, Washington University School of Medicine, St. Louis, MO, USA
- 89 KU Leuven – University of Leuven, Department of Neurosciences, Experimental Neurology, Leuven, Belgium
- 90 VIB Center for Brain & Disease Research, University Hospitals Leuven, Department of Neurology, Leuven, Belgium
- 91 Univ.-Lille, INSERM U 1171. CHU Lille. Lille, France
- 92 Department of Medical and Molecular Genetics, King's College London, London, UK
- 93 SGDP Centre, Institute of Psychiatry, Psychology & Neuroscience, King's College London, London, UK
- 94 Northern Institute for Cancer Research, Paul O'Gorman Building, Newcastle University, Newcastle, UK
- 95 Department of Clinical Sciences Lund, Neurology, Lund University, Lund, Sweden
- 96 Department of Neurology and Rehabilitation Medicine, Skåne University Hospital, Lund, Sweden
- 97 Bioinformatics Core Facility, University of Gothenburg, Gothenburg, Sweden
- 98 Department of Medical Epidemiology and Biostatistics, Karolinska Institutet, Stockholm, Sweden
- 99 University of Technology Sydney, Faculty of Health, Ultimo, Australia
- 100 Department of Medicine, University of Maryland School of Medicine, MD, USA
- 101 Department of Neurology, Mayo Clinic, Jacksonville, FL, USA
- 102 Geriatrics Research and Education Clinical Center, Baltimore Veterans Administration Medical Center, Baltimore, MD, USA
- 103 Division of Geriatrics, School of Medicine, University of Mississippi Medical Center, Jackson, MS, USA
- 104 Memory Impairment and Neurodegenerative Dementia Center, University of Mississippi Medical Center, Jackson, MS, USA
- 105 Laboratory of Neurogenetics, National Institute on Aging, National Institutes of Health, Bethesda, MD, USA



106 Data Tecnica International, Glen Echo MD, USA  
107 Department of Epidemiology and Public Health, Graduate School of Medical Sciences, Kyushu University, Fukuoka, Japan  
108 Clinical Research Facility, Department of Medicine, NUI Galway, Galway, Ireland  
109 Cardiovascular Health Research Unit, Department of Medicine, University of Washington, Seattle, WA, USA  
110 Department of Epidemiology, University of Washington, Seattle, WA  
111 Department of Health Services, University of Washington, Seattle, WA, USA  
112 Kaiser Permanente Washington Health Research Institute, Seattle, WA, USA  
113 Brain Center Rudolf Magnus, Department of Neurology, University Medical Center Utrecht, Utrecht, The Netherlands  
114 Usher Institute of Population Health Sciences and Informatics, University of Edinburgh, Edinburgh, UK  
115 Centre for Clinical Brain Sciences, University of Edinburgh, Edinburgh, UK  
116 Fred Hutchinson Cancer Research Center, University of Washington, Seattle, WA, USA  
117 Department of Medicine, Brigham and Women's Hospital, Boston, MA, USA  
118 Department of Biostatistics, University of Washington, Seattle, WA, USA  
119 Nuffield Department of Clinical Neurosciences, University of Oxford, UK  
120 Institute for Translational Genomics and Population Sciences, Los Angeles Biomedical Research Institute at Harbor-UCLA Medical Center, Torrance, CA, USA  
121 Division of Genomic Outcomes, Department of Pediatrics, Harbor-UCLA Medical Center, Torrance, CA, USA  
122 Department of Neurology, Miller School of Medicine, University of Miami, Miami, FL, USA  
123 Department of Allergy and Rheumatology, Graduate School of Medicine, the University of Tokyo, Tokyo, Japan  
124 Center for Public Health Genomics, University of Virginia, Charlottesville, VA, USA  
125 Department of Pediatrics, College of Medicine, University of Oklahoma Health Sciences Center, Oklahoma City, OK, USA  
126 Department of Neurology, Medical University of Graz, Graz, Austria  
127 University Medicine Greifswald, Institute for Community Medicine, SHIP-KEF, Greifswald, Germany  
128 University Medicine Greifswald, Department of Neurology, Greifswald, Germany  
129 Department of Neurology, Jagiellonian University, Krakow, Poland  
130 Department of Neurology, Justus Liebig University, Giessen, Germany  
131 Department of Clinical Neurosciences/Neurology, Institute of Neuroscience and Physiology, Sahlgrenska Academy at University of Gothenburg, Gothenburg, Sweden  
132 Sahlgrenska University Hospital, Gothenburg, Sweden

133 Stroke Division, Florey Institute of Neuroscience and Mental Health, University of Melbourne, Heidelberg, Australia

134 Austin Health, Department of Neurology, Heidelberg, Australia

135 Department of Internal Medicine, Section Gerontology and Geriatrics, Leiden University Medical Center, Leiden, the Netherlands

136 INSERM U1219, Bordeaux, France

137 Department of Public Health, Bordeaux University Hospital, Bordeaux, France

138 Genetic Epidemiology Unit, Department of Epidemiology, Erasmus University Medical Center Rotterdam, Netherlands

139 Center for Medical Systems Biology, Leiden, Netherlands

140 School of Medicine, Dentistry and Nursing at the University of Glasgow, Glasgow, UK

141 Department of Epidemiology and Population Health, Albert Einstein College of Medicine, NY, USA

142 Department of Physiology and Biophysics, University of Mississippi Medical Center, Jackson, MS, USA

143 A full list of members and affiliations appears in the Supplementary Note

144 Department of Human Genetics, McGill University, Montreal, Canada

145 Department of Pathophysiology, Institute of Biomedicine and Translation Medicine, University of Tartu, Tartu, Estonia

146 Department of Cardiac Surgery, Tartu University Hospital, Tartu, Estonia

147 Clinical Gene Networks AB, Stockholm, Sweden

148 Department of Genetics and Genomic Sciences, The Icahn Institute for Genomics and Multiscale Biology Icahn School of Medicine at Mount Sinai, New York, NY , USA

149 Department of Pathophysiology, Institute of Biomedicine and Translation Medicine, University of Tartu, Biomeedikum, Tartu, Estonia

150 Integrated Cardio Metabolic Centre, Department of Medicine, Karolinska Institutet, Karolinska Universitetssjukhuset, Huddinge, Sweden.

151 Clinical Gene Networks AB, Stockholm, Sweden

152 Sorbonne Universit es, UPMC Univ. Paris 06, INSERM, UMR\_S 1166, Team Genomics & Pathophysiology of Cardiovascular Diseases, Paris, France

153 ICAN Institute for Cardiometabolism and Nutrition, Paris, France

154 Department of Biomedical Engineering, University of Virginia, Charlottesville, VA, USA

155 Group Health Research Institute, Group Health Cooperative, Seattle, WA, USA

156 Seattle Epidemiologic Research and Information Center, VA Office of Research and Development, Seattle, WA, USA

157 Cardiovascular Research Center, Massachusetts General Hospital, Boston, MA, USA

158 Department of Medical Research, B arum Hospital, Vestre Viken Hospital Trust, Gjøttem, Norway

159 Saw Swee Hock School of Public Health, National University of Singapore and National University Health System, Singapore

160 National Heart and Lung Institute, Imperial College London, London, UK

161 Department of Gene Diagnostics and Therapeutics, Research Institute, National Center for Global Health and Medicine, Tokyo, Japan

162 Department of Epidemiology, Tulane University School of Public Health and Tropical Medicine, New Orleans, LA, USA

163 Department of Cardiology, University Medical Center Groningen, University of Groningen, Netherlands

164 MRC-PHE Centre for Environment and Health, School of Public Health, Department of Epidemiology and Biostatistics, Imperial College London, London, UK

165 Department of Epidemiology and Biostatistics, Imperial College London, London, UK

166 Department of Cardiology, Ealing Hospital NHS Trust, Southall, UK

167 National Heart, Lung and Blood Research Institute, Division of Intramural Research, Population Sciences Branch, Framingham, MA, USA

168 A full list of members and affiliations appears at the end of the manuscript

169 Department of Pharmaceutical Sciences, College of Pharmacy, University of Oklahoma Health Sciences Center, Oklahoma City, OK, USA

170 Oklahoma Center for Neuroscience, Oklahoma City, OK, USA

171 Department of Pathology and Genetics, Institute of Biomedicine, The Sahlgrenska Academy at University of Gothenburg, Gothenburg, Sweden

172 Department of Neurology, Helsinki University Hospital, Helsinki, Finland

173 Clinical Neurosciences, Neurology, University of Helsinki, Helsinki, Finland

174 Department of Neurology, University of Washington, Seattle, WA, USA

175 Albrecht Kossel Institute, University Clinic of Rostock, Rostock, Germany

176 Clinical Trial Service Unit and Epidemiological Studies Unit, Nuffield Department of Population Health, University of Oxford, Oxford, UK

177 Department of Genetics, Perelman School of Medicine, University of Pennsylvania, PA, USA

178 Faculty of Medicine, University of Iceland, Reykjavik, Iceland

179 Departments of Neurology and Public Health Sciences, University of Virginia School of Medicine, Charlottesville, VA, USA

180 Department of Neurology, Boston University School of Medicine, Boston, MA, USA

181 Human Genetics Center, University of Texas Health Science Center at Houston, Houston, TX, USA

182 Center for Genomic Medicine, Kyoto University Graduate School of Medicine, Kyoto, Japan

183 Munich Cluster for Systems Neurology (SyNergy), Munich, Germany

184 German Center for Neurodegenerative Diseases (DZNE), Munich, Germany

185 Boston University School of Medicine, Boston, MA, USA

186 University of Kentucky College of Public Health, Lexington, KY, USA

187 University of Newcastle and Hunter Medical Research Institute, New Lambton, Australia

188 Univ. Montpellier, Inserm, U1061, Montpellier, France

189 Centre for Research in Environmental Epidemiology, Barcelona, Spain

190 Department of Neurology, Università degli Studi di Perugia, Umbria, Italy

191 Department of Medicine, University of Maryland School of Medicine, Baltimore, MD, USA

192 Broad Institute, Cambridge, MA, USA

193 Univ. Bordeaux, Inserm, Bordeaux Population Health Research Center, UMR 1219, Bordeaux, France

194 Bordeaux University Hospital, Department of Neurology, Memory Clinic, Bordeaux, France

195 Neurovascular Research Laboratory. Vall d'Hebron Institut of Research, Neurology and Medicine Departments-Universitat Autònoma de Barcelona. Vall d'Hebrón Hospital, Barcelona, Spain

196 University Medicine Greifswald, Department of Internal Medicine B, Greifswald, Germany

197 DZHK, Greifswald, Germany

198 Robertson Center for Biostatistics, University of Glasgow, Glasgow, UK

199 Hero DMC Heart Institute, Dayanand Medical College & Hospital, Ludhiana, India

200 Atherosclerosis Research Unit, Department of Medicine Solna, Karolinska Institutet, Stockholm, Sweden

201 Karolinska Institutet, Stockholm, Sweden

202 Division of Emergency Medicine, and Department of Neurology, Washington University School of Medicine, St. Louis, MO, USA

203 Tohoku Medical Megabank Organization, Sendai, Japan

204 Department of Psychiatry, Washington University School of Medicine, St. Louis, MO, USA

205 Department of Public Health and Caring Sciences / Geriatrics, Uppsala University, Uppsala, Sweden

206 Epidemiology and Prevention Group, Center for Public Health Sciences, National Cancer Center, Tokyo, Japan

207 Department of Internal Medicine and the Center for Clinical and Translational Science, The Ohio State University, Columbus, OH, USA

208 Institute of Neuroscience and Physiology, the Sahlgrenska Academy at University of Gothenburg, Goteborg, Sweden

209 Department of Basic and Clinical Neurosciences, King's College London, London, UK

210 Department of Health Care Administration and Management, Graduate School of Medical Sciences, Kyushu University, Japan

211 Department of Medicine and Clinical Science, Graduate School of Medical Sciences, Kyushu University, Japan

212 Landspítali National University Hospital, Departments of Neurology & Radiology, Reykjavik, Iceland

213 Department of Neurology, Heidelberg University Hospital, Germany

214 Department of Neurology, Erasmus University Medical Center

215 Hospital Universitari Mutua Terrassa, Terrassa (Barcelona), Spain

216 Albert Einstein College of Medicine, Montefiore Medical Center, New York, NY, USA

217 John Hunter Hospital, Hunter Medical Research Institute and University of Newcastle, Newcastle, NSW, Australia

218 Centre for Prevention of Stroke and Dementia, Nuffield Department of Clinical Neurosciences, University of Oxford, UK

219 Department of Medical Sciences, Uppsala University, Uppsala, Sweden

220 Genetic and Genomic Epidemiology Unit, Wellcome Trust Centre for Human Genetics, University of Oxford, Oxford, UK

221 The Wellcome Trust Centre for Human Genetics, Oxford, UK

222 Beth Israel Deaconess Medical Center, Boston, MA, USA

223 Wake Forest School of Medicine, Wake Forest, NC, USA

224 Department of Neurology, University of Pittsburgh, Pittsburgh, PA, USA

225 BioBank Japan, Laboratory of Clinical Sequencing, Department of Computational biology and medical Sciences, Graduate school of Frontier Sciences, The University of Tokyo, Tokyo, Japan

226 Neurovascular Research Laboratory, Vall d'Hebron Institut of Research, Neurology and Medicine Departments-Universitat Autònoma de Barcelona. Vall d'Hebrón Hospital, Barcelona, Spain

227 Department of Biostatistics, University of Liverpool, Liverpool, UK

228 Wellcome Trust Centre for Human Genetics, University of Oxford, Oxford, UK

229 Institute of Genetic Epidemiology, Helmholtz Zentrum München - German Research Center for Environmental Health, Neuherberg, Germany

230 Department of Medicine I, Ludwig-Maximilians-Universität, Munich, Germany

231 DZHK (German Centre for Cardiovascular Research), partner site Munich Heart Alliance, Munich, Germany

232 Department of Cerebrovascular Diseases, Fondazione IRCCS Istituto Neurologico "Carlo Besta", Milano, Italy

233 Karolinska Institutet, MEB, Stockholm, Sweden

234 University of Tartu, Estonian Genome Center, Tartu, Estonia, Tartu, Estonia

235 Department of Clinical and Experimental Sciences, Neurology Clinic, University of Brescia, Italy

236 Translational Genomics Unit, Department of Oncology, IRCCS Istituto di Ricerche Farmacologiche Mario Negri, Milano, Italy

237 Department of Genetics, Microbiology and Statistics, University of Barcelona, Barcelona, Spain

238 Psychiatric Genetics Unit, Group of Psychiatry, Mental Health and Addictions, Vall d'Hebron Research Institute (VHIR), Universitat Autònoma de Barcelona, Biomedical Network Research Centre on Mental Health (CIBERSAM), Barcelona, Spain

239 Department of Neurology, IMIM-Hospital del Mar, and Universitat Autònoma de Barcelona, Spain

240 IMIM (Hospital del Mar Medical Research Institute), Barcelona, Spain

241 National Institute for Health Research Comprehensive Biomedical Research Centre, Guy's & St. Thomas' NHS Foundation Trust and King's College London, London, UK

242 Division of Health and Social Care Research, King's College London, London, UK

243 FIMM-Institute for Molecular Medicine Finland, Helsinki, Finland

244 THL-National Institute for Health and Welfare, Helsinki, Finland

245 Iwate Tohoku Medical Megabank Organization, Iwate Medical University, Iwate, Japan

246 BHF Glasgow Cardiovascular Research Centre, Faculty of Medicine, Glasgow, UK

247 deCODE Genetics/Amgen, Inc., Reykjavik, Iceland

248 Icelandic Heart Association, Reykjavik, Iceland

249 Institute of Biomedicine, the Sahlgrenska Academy at University of Gothenburg, Goteborg, Sweden

250 Department of Epidemiology, University of Maryland School of Medicine, Baltimore, MD, USA

251 Institute of Cardiovascular and Medical Sciences, Faculty of Medicine, University of Glasgow, Glasgow, UK

252 Chair of Genetic Epidemiology, IBE, Faculty of Medicine, LMU Munich, Germany

253 Division of Epidemiology and Prevention, Aichi Cancer Center Research Institute, Nagoya, Japan

254 Department of Epidemiology, Nagoya University Graduate School of Medicine, Nagoya, Japan

255 University Medicine Greifswald, Institute for Community Medicine, SHIP-KEF, Greifswald, Germany

256 Department of Neurology, Caen University Hospital, Caen, France

257 University of Caen Normandy, Caen, France

258 Department of Internal Medicine, Erasmus University Medical Center, Rotterdam, Netherlands

259 Landspítali University Hospital, Reykjavik, Iceland

260 Survey Research Center, University of Michigan, Ann Arbor, MI, USA

261 University of Virginia Department of Neurology, Charlottesville, VA, USA
